# Supplementary material for: Pseudomonas cannabina pv. alisalensis Virulence Factors Are Involved in Resistance to Plant-Derived Antimicrobials during Infection
Source: MDPI journal article supplement (doi:10.3390/plants11131742), 2022-06-30
Supplement: s1 [file s1]

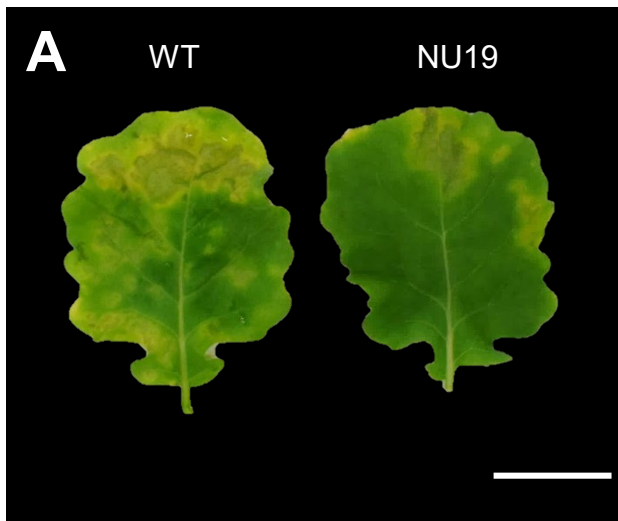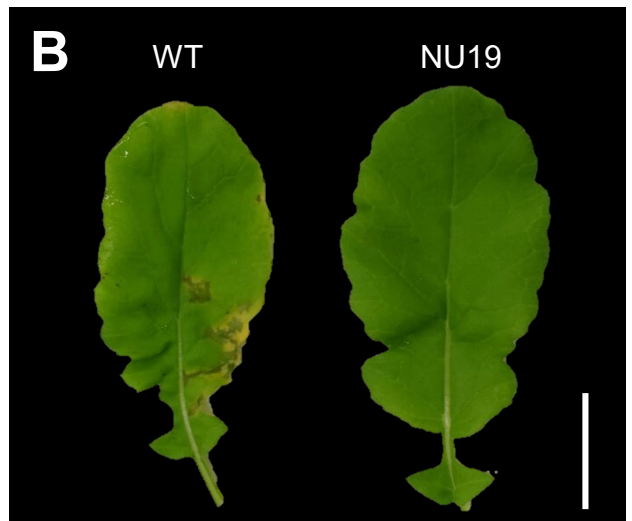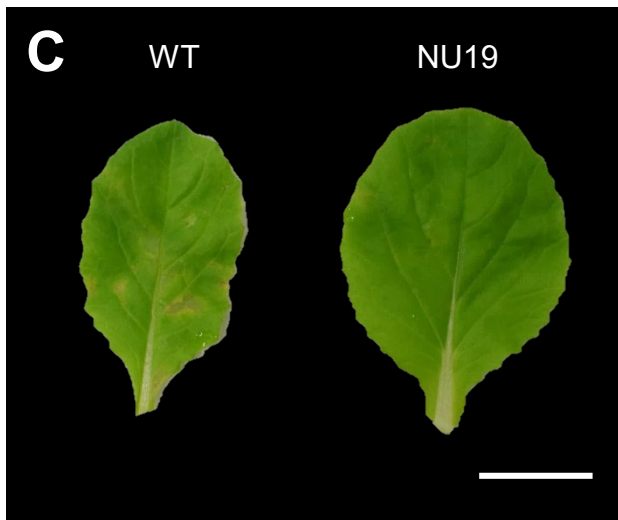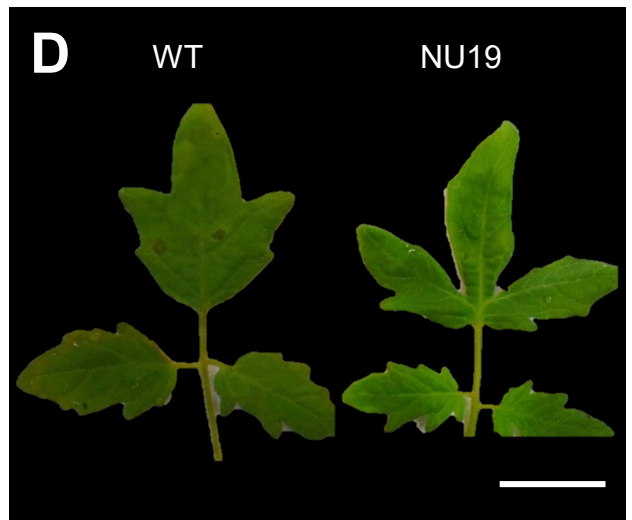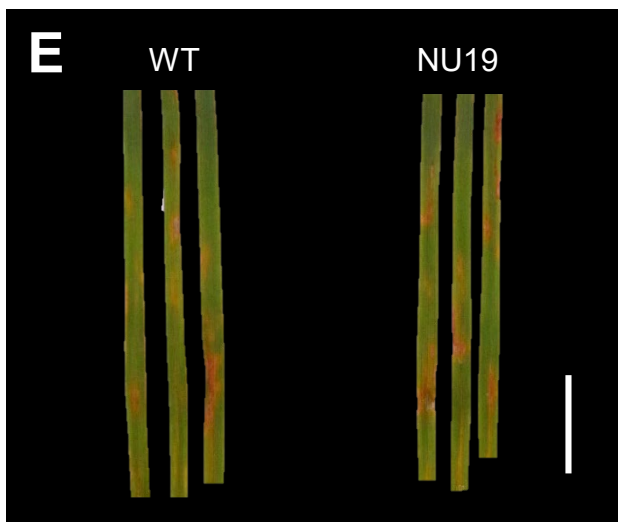

**Figure S3.** Disease symptoms on broccoli (A), Japanese radish (B), Chinese cabbage (C), tomato (D), and oat (E) dip-inoculated with *Pseudomonas cannabina* pv. *alisalensis* KB211 WT and NU19. All plants were dip-inoculated with  $5 \times 10^7$  CFU/ml of inoculum containing 0.025% SilwetL-77. The leaves were photographed at 5 dpi.
