# Supplementary material for: Pseudomonas cannabina pv. alisalensis Virulence Factors Are Involved in Resistance to Plant-Derived Antimicrobials during Infection
Source: MDPI journal article supplement (doi:10.3390/plants11131742), 2022-06-30
Supplement: s1 [file s1]

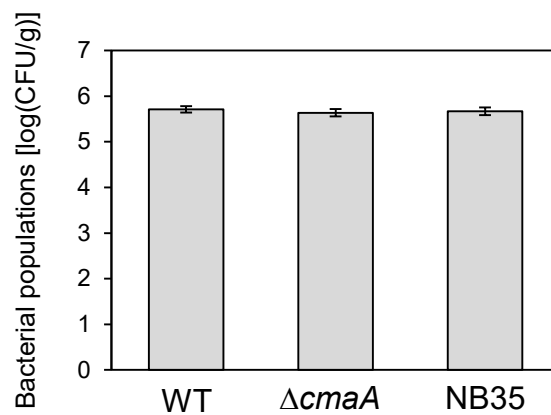

**Figure S4.** Bacterial populations in cabbage syringe-inoculated with *Pseudomonas cannabina* pv. *alisalensis* KB211 WT,  $\Delta cmaA$ , and NB35 (TTSS mutant). Cabbage plants were syringe-inoculated with  $5 \times 10^7$  CFU/ml of inoculum. The bacterial populations in the plant were evaluated at 6 hpi. Vertical bars indicate the standard error for at least three independent experiments.
