# Supplementary material for: Pseudomonas cannabina pv. alisalensis Virulence Factors Are Involved in Resistance to Plant-Derived Antimicrobials during Infection
Source: MDPI journal article supplement (doi:10.3390/plants11131742), 2022-06-30
Supplement: s1 [file s1]

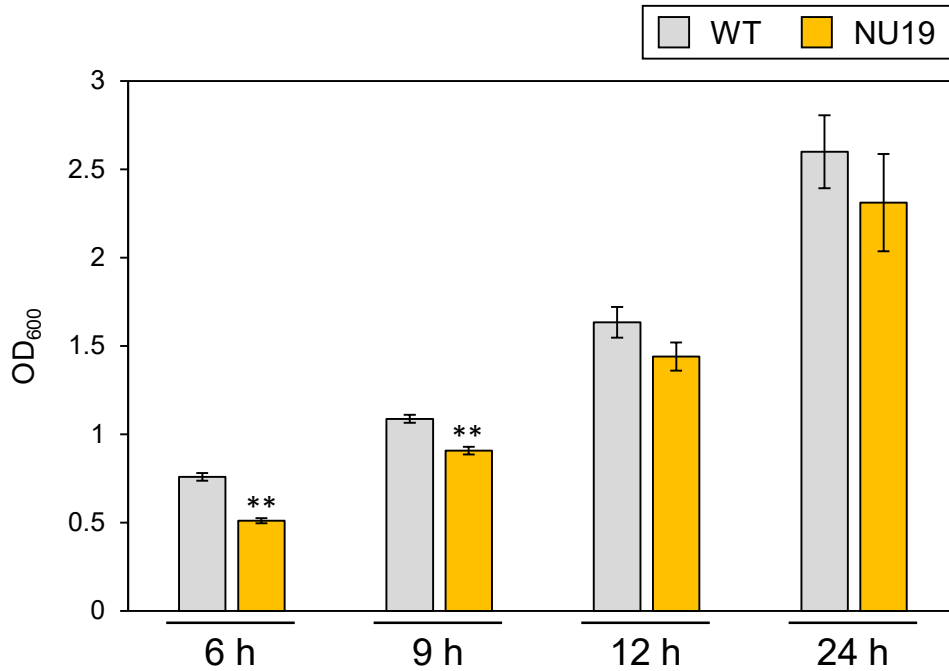

**Figure S1.** *Pseudomonas cannabina* pv. *alisalensis* KB211 WT and NU19 growth in KB medium. These strains were adjusted to an OD<sub>600</sub> of 0.01 in KB medium and incubated with shaking at 28°C. Bacterial growth was quantified at 6, 9, 12, and 24 h. Vertical bars indicate the standard error for three biological replicates. Asterisks indicate a significant difference from the water treatment control in a t-test (\*\* $p < 0.01$ ).
