# Supplementary material for: Pseudomonas cannabina pv. alisalensis Virulence Factors Are Involved in Resistance to Plant-Derived Antimicrobials during Infection
Source: MDPI journal article supplement (doi:10.3390/plants11131742), 2022-06-30
Supplement: s1 [file s1]

**Table S2.** Primer sets used in this study

| Gene               | Primer name            | Primer sequence            | Reference          |
|--------------------|------------------------|----------------------------|--------------------|
| <i>BoUBQ1</i>      | BoUBQ1-FW              | GTCAAGGCCAAGATCCAAGA       | Ishiga et al. 2020 |
| <i>BoUBQ1</i>      | BoUBQ1-RV              | GGATGTTGTAGTCAGCCAGAG      | Ishiga et al. 2020 |
| <i>BoCYP83B1</i>   | <i>BoCYP83B1</i> -FW   | CTTTCGTCTCTCCAAGCTCTAC     | This study         |
| <i>BoCYP83B1</i>   | <i>BoCYP83B1</i> -RV   | TTGAGGAGTTCCTTGGCTAAC      | This study         |
| <i>BoBABG.a</i>    | <i>BoBABG.a</i> -FW    | GTTCCGGTTCAAGTGGTATCT      | This study         |
| <i>BoBABG.a</i>    | <i>BoBABG.a</i> -RV    | GTTTCCTCCTCCTCTTCTTCAC     | This study         |
| <i>BoBABG.b</i>    | <i>BoBABG.b</i> -FW    | GGACAGAGTACCACAAGAAACA     | This study         |
| <i>BoBABG.b</i>    | <i>BoBABG.b</i> -RV    | GTCTAGTAAGGACCAGGCAAAG     | This study         |
| <i>BoDTCMT</i>     | <i>BoDTCMT</i> -FW     | TTGAGGACAGTGGGTGTTTC       | This study         |
| <i>BoDTCMT</i>     | <i>BoDTCMT</i> -RV     | TGTGTGAGGTTACCAAGAACTC     | This study         |
| <i>BoCYP83A1</i>   | <i>BoCYP83A1</i> -FW   | ACTGAAGACGACGTGAAGAAC      | This study         |
| <i>BoCYP83A1</i>   | <i>BoCYP83A1</i> -RV   | ATGCAAGCACGAGGGATAAG       | This study         |
| <i>BoFMOGS-OX2</i> | <i>BoFMOGS-OX2</i> -FW | GGATTAATAGCGGCCAGAGAG      | This study         |
| <i>BoFMOGS-OX2</i> | <i>BoFMOGS-OX2</i> -RV | GCGGGTCGGATTCAGATTTA       | This study         |
| <i>BoFMOGS-OX5</i> | <i>BoFMOGS-OX5</i> -FW | GACTCTGTGGTCGTGTGTAATG     | This study         |
| <i>BoFMOGS-OX5</i> | <i>BoFMOGS-OX5</i> -RV | CAGGAACCTCTGTAGTTGTGACTATG | This study         |
| <i>BoCYP81F2</i>   | <i>BoCYP81F2</i> -FW   | GCATGAGGCCTTTGATGATGAC     | This study         |
| <i>BoCYP81F2</i>   | <i>BoCYP81F2</i> -RV   | GAGCATATACGGCGGAGATTAC     | This study         |
| <i>BoCYP81F4</i>   | <i>BoCYP81F4</i> -FW   | CGTCTGCTTGATGAGTGTAGAGG    | This study         |
| <i>BoCYP81F4</i>   | <i>BoCYP81F4</i> -RV   | CTGGGTCTTGTTGTTGCAAAG      | This study         |
