# Supplementary material for: Pseudomonas cannabina pv. alisalensis Virulence Factors Are Involved in Resistance to Plant-Derived Antimicrobials during Infection
Source: MDPI journal article supplement (doi:10.3390/plants11131742), 2022-06-30
Supplement: s1 [file s1]

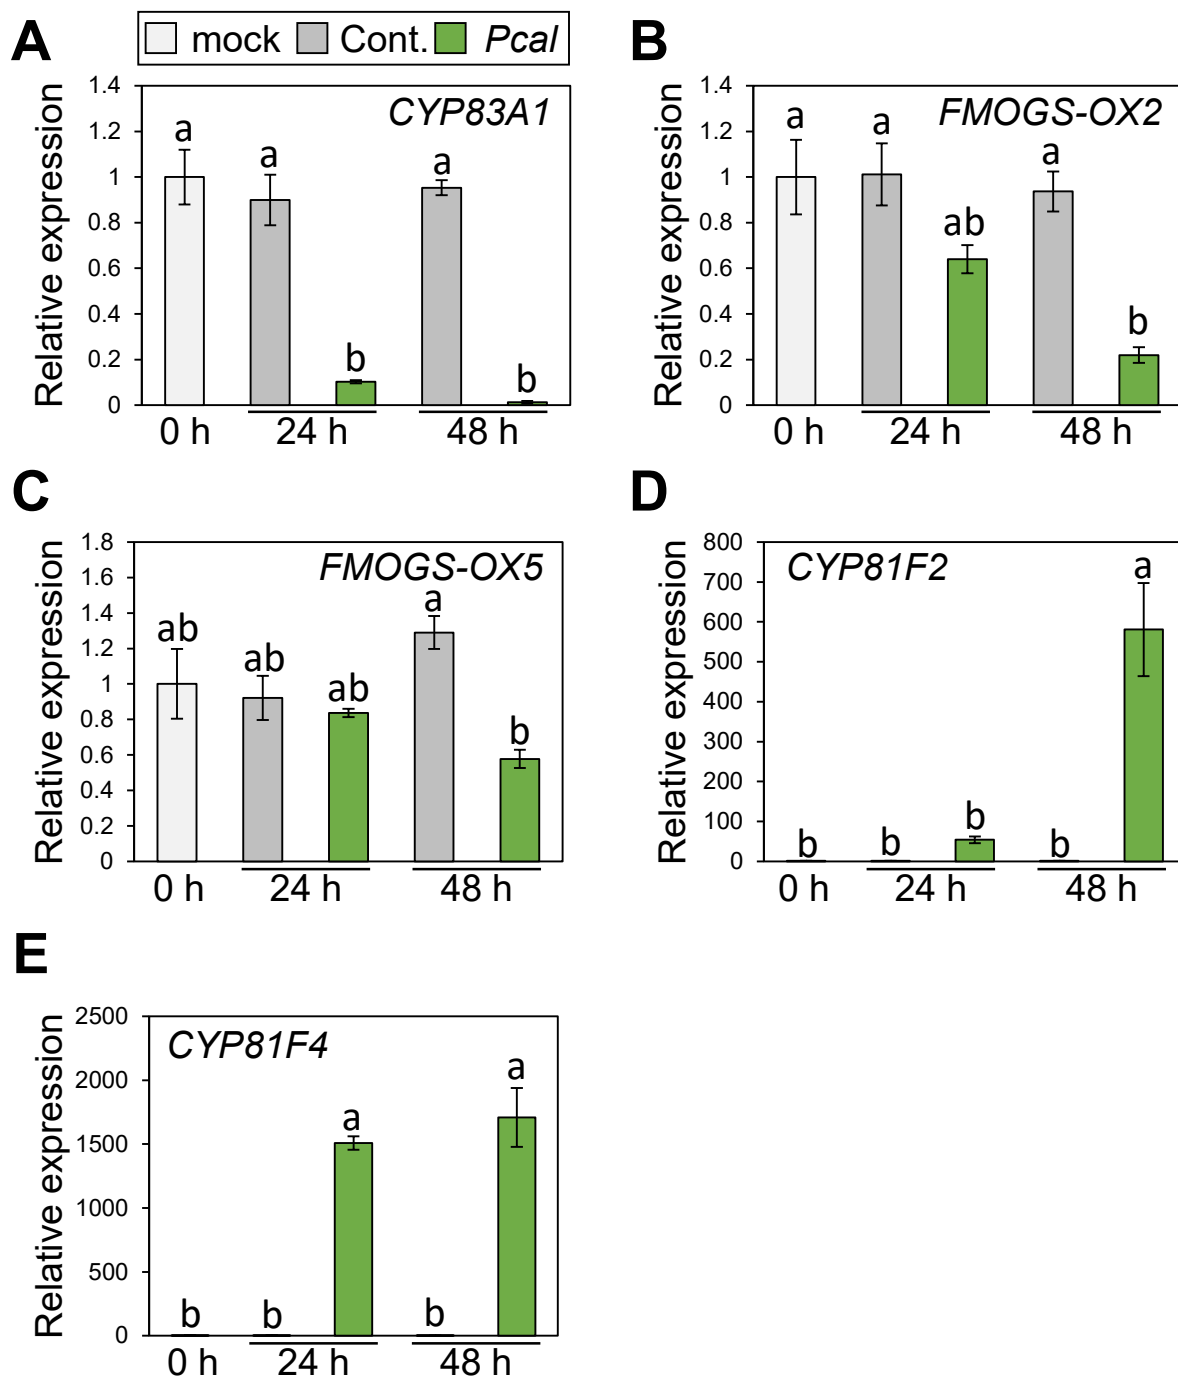

**Figure S2.** Expression profiles of *CYP83A1* (A), *FMOGS-OX2* (B), *FMOGS-OX5* (C), *CYP81F2* (D), *CYP81F4* (E) were determined 24 and 48 h after inoculation with  $5 \times 10^5$  CFU/ml of WT or mock water-inoculated control, using real-time quantitative reverse transcription PCR with gene-specific primer sets. Expression in cabbage was normalized using *BoUBQ1*. Vertical bars indicate the standard error for three biological replicates. Different letters indicate a significant difference among treatments based on a Tukey's honestly significant different test ( $p < 0.05$ ).
