# Supplementary material for: Pseudomonas cannabina pv. alisalensis Virulence Factors Are Involved in Resistance to Plant-Derived Antimicrobials during Infection
Source: MDPI journal article supplement (doi:10.3390/plants11131742), 2022-06-30
Supplement: s1 [file s1]

**Table S1.** Bacterial strains and plasmids used in this study

| Bacterial strain or plasmid                                                                                                                | Relevant characteristics                                                                                                                                      | Reference or source                                      |
|--------------------------------------------------------------------------------------------------------------------------------------------|---------------------------------------------------------------------------------------------------------------------------------------------------------------|----------------------------------------------------------|
| <i>P. cannabina</i> pv. <i>alisalensis</i>                                                                                                 |                                                                                                                                                               |                                                          |
| Isolate KB211                                                                                                                              | Wild type, Rif <sup>r</sup>                                                                                                                                   | Nagano vegetable and ornamental crops experiment station |
| <i>P. cannabina</i> pv. <i>alisalensis</i> Tn5 mutants                                                                                     |                                                                                                                                                               |                                                          |
| NU19                                                                                                                                       | Tn5 mutant containing transposon in gene encoding resistance-nodulation-cell division (RND) transporter, Rif <sup>r</sup> , Km <sup>r</sup> , Cm <sup>r</sup> | Sakata et al. (2019)                                     |
| NB35                                                                                                                                       | Tn5 mutant containing transposon in gene encoding type III secretion protein HrcQb, Rif <sup>r</sup> , Km <sup>r</sup> , Cm <sup>r</sup>                      | Sakata et al. (2019)                                     |
| <i>ΔcmaA</i>                                                                                                                               | <i>Pcal</i> KB211 <i>ΔcmaA</i> , Rif <sup>r</sup>                                                                                                             | Sakata et al. (2021)                                     |
| <i>Cm<sup>r</sup></i> chloramphenicol resistance, <i>Km<sup>r</sup></i> kanamycin resistance, <i>Rif<sup>r</sup></i> rifampicin resistance |                                                                                                                                                               |                                                          |
