# Supplementary material for: Pseudomonas cannabina pv. alisalensis Virulence Factors Are Involved in Resistance to Plant-Derived Antimicrobials during Infection
Source: Plants (Basel). 2022 Jun 30;11(13):1742. doi: 10.3390/plants11131742 (PMC9269351; doi:10.3390/plants11131742)
Supplement: Supplementary file 1 [file plants-11-01742-s001.zip › Spreadsheet.xlsx]

## Sheet: Figure S5B
		weight(g)	Colony number	Dilution	CFU	CFU/cm2	Log(CFU/cm2)	Ave	SE	TTEST
0dpi	WT	0.51	11	250000	2750000	5.39216e+06	6.73176	6.36815	0.333699				WT	NU19
		0.52	43	25000	1075000	2.06731e+06	6.31541					0dpi	6.36815	6.48005
		0.4	15	250000	3750000	9375000	6.97197					3dpi	8.58055	6.53896
		0.44	5	25000	125000	284091	5.45346					5dpi	8.20139	7.04464
	NU19	0.53	71	25000	1775000	3.34906e+06	6.52492	6.48005	0.0366774	0.750233
		0.59	61	25000	1525000	2.58475e+06	6.41242						WT	NU19
		0.5	53	25000	1325000	2650000	6.42325					0dpi	0.333699	0.0366774
		0.51	74	25000	1850000	3.62745e+06	6.5596					3dpi	0.225998	0.439741
												5dpi	0.159619	0.280017
3dpi	WT	0.55	71	25000000	1775000000	3.22727e+09	9.50884	8.58055	0.225998
		0.43	27	2500000	67500000	1.56977e+08	8.19584					Tukey's HSD test
		0.47	38	2500000	95000000	2.02128e+08	8.30563					SampleA-SampleB	p-value
		0.77	202	2500000	505000000	6.55844e+08	8.8168					NU19-5-NU19-3	0.626886
		0.5	11	2500000	27500000	55000000	7.74036					WT-3-NU19-3	0.0010553
		0.67	22	2500000	55000000	8.20896e+07	7.91429					WT-5-NU19-3	0.0031644
		0.76	24	25000000	600000000	7.89474e+08	8.89734					WT-3-NU19-5	0.0193172
		0.38	28	25000000	700000000	1.84211e+09	9.26531					WT-5-NU19-5	0.0550665
	NU19	0.39	33	2500000	82500000	2.11538e+08	8.32539	6.53896	0.439741	0.00122699		WT-5-WT-3	0.949419
		0.29	36	2500000	90000000	3.10345e+08	8.49184
		0.48	39	250000	9750000	20312500	7.30776
		0.56	22	250000	5500000	9.82143e+06	6.99217
		0.64	78	2500	195000	304688	5.48385
		0.56	12	25000	300000	535714	5.72893
		0.47	8	2500	20000	42553.2	4.62893
		0.46	16	25000	400000	869565	5.9393
		0.53	19	25000	475000	896226	5.95242
5dpi	WT	0.49	16	2500000	40000000	8.16327e+07	7.91186	8.20139	0.159619
		0.32	18	2500000	45000000	140625000	8.14806
		0.28	52	2500000	130000000	4.64286e+08	8.66679
		0.81	39	2500000	97500000	1.2037e+08	8.08052
		0.71	43	2500000	107500000	1.51408e+08	8.18015
		0.5	17	25000000	425000000	850000000	8.92942
		0.7	5	25000000	125000000	1.78571e+08	8.25181
		0.37	41	250000	10250000	2.77027e+07	7.44252
	NU19	0.32	54	250000	13500000	42187500	7.62518	7.04464	0.280017	0.00344968
		0.5	56	250000	14000000	28000000	7.44716
		0.36	52	250000	13000000	3.61111e+07	7.55764
		0.58	5	25000	125000	215517	5.33348
		0.66	51	2500000	127500000	1.93182e+08	8.28597
		0.68	20	250000	5000000	7.35294e+06	6.86646
		0.63	13	250000	3250000	5.15873e+06	6.71254
		0.75	10	250000	2500000	3.33333e+06	6.52288
		0.69	31	250000	7750000	1.12319e+07	7.05045

## Sheet: Figure S5A
	Ct values														Tukey's HSD test
	BoUBQ1	BoCYP83B1	Realtive expression	Average(control)	Fold change	Average	Standard error		0time	Cont.24h	WT.24h	Cont.48h	WT.48h		SampleA-SampleB	p-value
0time	18.51	21.58	0.11908	0.143099	0.832151	1	0.0768419		1	1.04969	12.4716	1.08141	7.38323		C24-0time	1
	18.51	21.38	0.136787		0.95589				0.0768419	0.172272	0.930134	0.152421	0.677424		C48-0time	1
	18.8	21.59	0.144586		1.01039										WT24-0time	0
	19.54	22.08	0.171943		1.20157										WT48-0time	2.04e-05
C24	18.31	21.63	0.100134		0.699752	1.04969	0.172272								C48-C24	0.999999
	18.6	21.25	0.15932		1.11336										WT24-C24	0
	18.93	21.15	0.214641		1.49995										WT48-C24	8.3e-06
	18.51	21.49	0.126745		0.885716										WT24-C48	0
WT24	18	17.07	1.90528		13.3144	12.4716	0.930134								WT48-C48	8.8e-06
	17.78	16.77	2.01391		14.0736										WT48-WT24	9.62e-05
	17.99	17.13	1.81504		12.6838
	17.79	17.3	1.40444		9.81451
C48	18.8	21.79	0.125869		0.879598	1.08141	0.152421
	19.45	21.98	0.173139		1.20992
	19.23	21.5	0.20733		1.44886
	18.89	22.04	0.112656		0.787262
WT48	18.12	18.17	0.965936		6.75014	7.38323	0.677424
	18.31	17.89	1.33793		9.34968
	18.36	18.33	1.02101		7.13502
	17.7	17.85	0.90125		6.2981

## Sheet: Figure S6B
	Ct values														Tukey's HSD test
	BoUBQ1	BABG.a	Realtive expression	Average(control)	Fold change	Average	Standard error		0time	Cont.24h	WT.24h	Cont.48h	WT.48h		SampleA-SampleB	p-value
0time	18.51	25.01	0.0110485	0.0122062	0.905155	1	0.148031		1	0.888546	0.67113	1.06229	0.70128		C24-0time	0.853511
	18.51	25.17	0.00988872		0.810137				0.148031	0.0167898	0.0615136	0.113215	0.0599619		C48-0time	0.999479
	18.8	25.4	0.0103087		0.84454										WT24-0time	0.144924
	19.54	25.37	0.017579		1.44017										WT48-0time	0.203033
C24	18.31	24.91	0.0103087		0.84454	0.888546	0.0167898								C48-C24	0.692964
	18.6	25.09	0.0111254		0.911451										WT24-C24	0.502317
	18.93	25.47	0.0107464		0.880404										WT48-C24	0.633963
	18.51	24.99	0.0112028		0.917791										WT24-C48	0.0689886
WT24	18	24.76	0.00922651		0.755884	0.67113	0.0615136								WT48-C48	0.102572
	17.78	24.62	0.00872881		0.71511										WT48-WT24	0.999341
	17.99	24.81	0.00885066		0.725093
	17.79	25.18	0.00596195		0.488435
C48	18.8	25.49	0.00968522		0.793464	1.06229	0.113215
	19.45	25.47	0.0154099		1.26246
	19.23	25.28	0.0150928		1.23648
	18.89	25.31	0.0116785		0.956766
WT48	18.12	25.36	0.0066152		0.541952	0.70128	0.0599619
	18.31	25.14	0.00878952		0.720084
	18.36	25.21	0.00866851		0.71017
	17.7	24.32	0.0101667		0.832913

## Sheet: Figure S6C
	Ct values														Tukey's HSD test
	BoUBQ1	BABG.b	Realtive expression	Average(control)	Fold change	Average	Standard error		0time	Cont.24h	WT.24h	Cont.48h	WT.48h		SampleA-SampleB	p-value
0time	18.51	27.31	0.00224355	0.00204835	1.0953	1	0.146679		1	1.35289	30.1357	0.886287	242.784		C24-0time	1
	18.51	27.08	0.00263132		1.2846				0.146679	0.114106	6.11931	0.232011	18.9466		C48-0time	1
	18.8	27.69	0.00210787		1.02906										WT24-0time	0.284655
	19.54	29.23	0.00121065		0.591039										WT48-0time	0
C24	18.31	27.21	0.00209331		1.02195	1.35289	0.114106								C48-C24	1
	18.6	26.99	0.00298098		1.45531										WT24-C24	0.232579
	18.93	27.38	0.00285954		1.39602										WT48-C24	0
	18.51	26.82	0.00315094		1.53829										WT24-C48	0.220207
WT24	18	22.07	0.0595399		29.0673	30.1357	6.11931								WT48-C48	0
	17.78	21.24	0.0908733		44.3642										WT48-WT24	0
	17.99	23.05	0.029977		14.6347
	17.79	21.7	0.0665231		32.4765
C48	18.8	28.54	0.00116941		0.570906	0.886287	0.232011
	19.45	28.36	0.00207885		1.01489
	19.23	27.59	0.00304361		1.48589
	18.89	28.9	0.000969817		0.473463
WT48	18.12	19.3	0.441351		215.467	242.784	18.9466
	18.31	19.02	0.61132		298.446
	18.36	19.42	0.479632		234.156
	17.7	18.83	0.456916		223.066

## Sheet: Figure S6D
	Ct values														Tukey's HSD test
	BoUBQ1	DTCMT	Realtive expression	Average(control)	Fold change	Average	Standard error		0time	Cont.24h	WT.24h	Cont.48h	WT.48h		SampleA-SampleB	p-value
0time	18.51	27.83	0.00156459	0.00309469	0.505573	1	0.291131		1	1.02125	104.173	1.04237	182.749		C24-0time	1
	18.51	26.76	0.00328475		1.06142				0.291131	0.138814	10.3338	0.515039	18.7392		C48-0time	1
	18.8	26.29	0.0055627		1.7975										WT24-0time	7.12e-05
	19.54	28.53	0.00196671		0.635512										WT48-0time	1e-07
C24	18.31	27.34	0.00191293		0.618134	1.02125	0.138814								C48-C24	1
	18.6	26.64	0.00379943		1.22773										WT24-C24	3e-05
	18.93	27.03	0.00364466		1.17772										WT48-C24	0
	18.51	26.76	0.00328475		1.06142										WT24-C48	3.01e-05
WT24	18	19.58	0.334482		108.083	104.173	10.3338								WT48-C48	0
	17.78	19.3	0.348686		112.672										WT48-WT24	0.0005233
	17.99	20.11	0.230047		74.3361
	17.79	19.2	0.376312		121.599
C48	18.8	27.71	0.00207885		0.671747	1.04237	0.515039
	19.45	28.69	0.0016538		0.5344
	19.23	26.2	0.00797666		2.57753
	18.89	28.6	0.00119398		0.385818
WT48	18.12	19.23	0.463294		149.706	182.749	18.7392
	18.31	18.83	0.697372		225.345
	18.36	19.03	0.628507		203.092
	17.7	18.78	0.473029		152.852

## Sheet: Figure S6E
brassinin	high
0	0
166.667	179
1666.67	3478
	retention time	high	conc. (nM)	nmol	g	nmol/g	ng/g	average (ng/g)	SE		Cont.	48hpi
Cont.	N.D.										0	77.4453
WT	16.546	422	158.836	0.079418	0.2175	0.36514	86.3045	77.4453	2.05631			2.05631
	16.555	376	137.253	0.0686264	0.2175	0.315524	74.5772
	16.521	348	124.115	0.0620577	0.2175	0.285323	67.4388
	16.534	403	149.921	0.0749606	0.2175	0.344646	81.4606

## Sheet: Figure S6F
	OD600	Ave.	SE	TTEST
KB+DMSO	1.8	1.41667	0.104616		DMSO	Brassinin
	1.4				1.41667	0.293333
	1				0.104616	0.0145297
	1.4
	1.5
	1.4
KB+Brassinin	0.32	0.293333	0.0145297	0.000159832
	0.27
	0.29

## Sheet: Figure S7A
DMSO	24h
WT	2.1	2.6	3			inhibiton rate(%)
	2.2	3	2.9		Brassinin	WT	RND
Ave.	2.15	2.8	2.95			58.8608	40
		Ave.	2.63333			0.0189873	0.0181818
		SE	0.245515
	24h
RND	2.5	2.5	2.7
	2.7	3.2	2.9
Ave.	2.6	2.85	2.8
		Ave.	2.75
		SE	0.0763763
Brassinin		24h
WT		1.5	1.4
		1.7	1.6
Ave.		1.6	1.5
inhibition rate		0.607595	0.56962
		Ave.	0.588608
		SE	0.0189873
		24h
RND		1.1	1.1
		1.2	1
Ave.		1.15	1.05
inhibition rate		0.418182	0.381818
		Ave.	0.4
		SE	0.0181818
		TTEST	0.0188793

## Sheet: Figure S7B
EtOH	24h
WT	2.6	2.4	2.6						inhibiton rate(%)
	2.4	2.8	2.8					Sulforaphane	WT	RND
Ave.	2.5	2.6	2.7	3.3	5.5	5.5			1.03671	0.702252
		Ave.	2.6		Ave.	4.76667			0.0487655	0.0302601
		SE	0.057735		SE	0.733333
	24h
RND	2.3	2.5	2.6
	2.9	3	2.8
Ave.	2.6	2.75	2.7	2	1.2	2.4
		Ave.	2.68333		Ave.	1.86667
		SE	0.0440959		SE	0.352767
Sulforaphan
	24h
WT	2.2	2.1	2.8
	2.6	2.5	2.8
Ave.	2.4	2.3	2.8	4.8	5.6	5.5
inhibition rate	0.923077	0.884615	1.07692	1.00699	1.17483	1.15385
					Ave.	1.03671
					SE	0.0487655
	24h
RND	2.1	1.5	1.9
	2.2	1.7	2
Ave.	2.15	1.6	1.95	1.4	1.2	1.3
inhibition rate	0.801242	0.596273	0.726708	0.75	0.642857	0.696429
					Ave.	0.702252
					SE	0.0302601
					TTEST	0.000166556

## Sheet: Figure S7C
DMSO	24h			24h			24h
WT	2.1	2.6	3				2.2	2.6	1.8			inhibiton rate(%)
	2.2	3	2.9				2	3	2.1		camalexin	WT	RND
Ave.	2.15	2.8	2.95	3.5	6.7	6.5	2.1	2.8	1.95			88.3305	82.3493
		Ave.	2.63333		Ave.	5.56667		Ave.	2.28333			7.81211	3.237
		SE	0.245515		SE	1.03494		SE	0.261937
	24h
RND	2.5	2.5	2.7				0.62	0.6	0.54
	2.7	3.2	2.9				0.6	0.55	0.65
Ave.	2.6	2.85	2.8	2.1	1.9	1.8	0.61	0.575	0.595
		Ave.	2.75		Ave.	1.93333		Ave.	0.593333
		SE	0.0763763		SE	0.0881917		SE	0.0101379
camalexin	24h
WT	2.2	2.5	2.5				1.6	1.9	3
	2.7	3	2.2				1.7	1.7	2.4
Ave.	2.45	2.75	2.35	5.7	5.5	2.1	1.65	1.8	2.7
inhibition rate	0.93038	1.0443	0.892405	1.02395	0.988024	0.377246	0.722628	0.788321	1.18248
								Ave.	0.883305
								SE	0.0781211
	24h
RND	1.8	2	1.7				0.54	0.5	0.55
	1.9	2.3	2.1				0.51	0.53	0.55
Ave.	1.85	2.15	1.9	1.7	1.5	1.8	0.525	0.515	0.55
inhibition rate	0.672727	0.781818	0.690909	0.87931	0.775862	0.931034	0.884831	0.867978	0.926966
								Ave.	0.823493
								SE	0.03237
								TTEST	0.489548

[truncated: 21 more sheets: Figure S7D, Figure S7E, Figure S7F, Figure S7G, Table S3, Figure S8A, Figure S8B, Figure S8C, Figure S8D, Figure S8E, Figure S9A, Figure S9B, Figure S9C, Figure S9F, Supplementary Figure S10, Supplementary Figure S11A, Supplementary Figure S12B, Supplementary Figure S12C, Supplementary Figure S12D, Supplementary Figure S12E …]
